# Supplementary material
Source: PubMed Central journal article supplement (PMC1891246)
Supplement: pnas_0700438104_13.pdf [file pnas_0700438104_13.pdf]

|                  | 2360                                                                 | 2467 |
|------------------|----------------------------------------------------------------------|------|
| mouse (100%)     | ...GSTGDALVFIE <b>K</b> ASTRYVVTT.....FRWHQPAPFD <b>K</b> QQTWAID... |      |
| human (95%)      | ...GSTGDALVFIE <b>K</b> ASTRYVVST.....FRWHQPAPFD <b>K</b> QQTWAID... |      |
| macaque (95%)    | ...GSTGDALVFIE <b>K</b> ASTRYVVST.....FRWHQPAPFD <b>K</b> QQTWAID... |      |
| dog (95%)        | ...GSTGDALVFIE <b>K</b> ASTRYVVTT.....FRWHQPAPFD <b>K</b> QQTWAID... |      |
| bovine (91%)     | ...GSTGDALVFIE <b>K</b> ASTRYVVTT.....FRWHQPAPFD <b>K</b> QQTWAID... |      |
| chicken (89%)    | ...GSTGDALVFIE <b>K</b> ASTRYVVTT.....FRWHQPAPFD <b>K</b> QQTWAID... |      |
| zebrafish (62%)  | ...GSDGAAFAFIE <b>K</b> SNTRYGVTT.....FRWFQPAPFD <b>K</b> QQTWALD... |      |
| lancelet (48%)   | ...GSKGKALHFSGNDKMRYAVSS.....FRWRQPDGFDPQOSWAIT...                   |      |
| ascidians (36%)  | ...VSIGGDRYSRINCGKSWIVTN.....FRWIQLIDSSSVNKWSID...                   |      |
| sea urchin (41%) | ...GVAHNALHFASNEQMRYTITS.....FRWSQPPRFDPGHEWALS...                   |      |

**Fig. 17**
