# Supplementary material
Source: PubMed Central journal article supplement (PMC1891246)
Supplement: pnas_0700438104_14.pdf [file pnas_0700438104_14.pdf]

Table 1. Crystallographic statistics of Reelin R5-6

---

|                                                      |                        |
|------------------------------------------------------|------------------------|
| <i>Data collection and reduction</i>                 |                        |
| Space group                                          | $P2_1$                 |
| Unit cell dimensions $a, b, c$ (Å)                   | 61.01, 70.95, 94.77    |
| $\beta$ (deg)                                        | 93.61                  |
| Resolution range (Å)                                 | 47.29-2.00 (2.07-2.00) |
| Completeness (%)                                     | 99.9 (99.9)            |
| Redundancy                                           | 4.1 (4.1)              |
| $R_{\text{merge}}$ (%)                               | 7.5 (32.5)             |
| $\langle I/\sigma(I) \rangle$                        | 21.8 (4.0)             |
| <br><i>Refinement</i>                                |                        |
| $R_{\text{work}}$ (%)                                | 17.9                   |
| $R_{\text{free}}$ (%)*                               | 21.9                   |
| Non-H atoms                                          | 6185                   |
| Protein (No. residues)                               | 5581 (705)             |
| Water                                                | 500                    |
| Acetate                                              | 3                      |
| Oligosaccharide                                      | 95                     |
| Ca <sup>2+</sup>                                     | 4                      |
| Zn <sup>2+</sup>                                     | 2                      |
| R.m.s.d from ideal values                            |                        |
| Bond lengths (Å)                                     | 0.009                  |
| Bond angles (deg)                                    | 1.16                   |
| Mean $B$ -factor for protein atoms (Å <sup>2</sup> ) |                        |
| Main chain                                           | 26.82                  |
| Side chain                                           | 27.57                  |
| Ramachandran plot (%)                                |                        |
| Most favored                                         | 84.9                   |
| Additionally allowed                                 | 14.4                   |
| Generously allowed                                   | 0.7                    |
| Disallowed                                           | 0                      |

---

\*  $R_{\text{free}}$  is the  $R$ -factor for 5% of the reflections excluded from the refinement.
