# Supplementary material
Source: PubMed Central journal article supplement (PMC1891246)
Supplement: pnas_0700438104_15.pdf [file pnas_0700438104_15.pdf]

Table 2. Analysis of Zn<sup>2+</sup>-ligand bond distances

| <i>Statistics of Zn-ligand distances*</i> |         |           |
|-------------------------------------------|---------|-----------|
|                                           | Mean(Å) | Ranges    |
| Zn-O / H <sub>2</sub> O, n=5              | 2.06    | 1.97-2.28 |
| Zn-O / carboxylate                        | 2.00    | 1.86-2.18 |
| Zn-N / imidazole                          | 2.00    | 1.97-2.04 |

  

| <i>Observed distances†</i>           |      |         |
|--------------------------------------|------|---------|
| (Zn-1 / R5, coordination number = 4) |      |         |
| Zn-O / Glu-2264                      | 1.91 |         |
| Zn-O / Glu-2179                      | 2.13 |         |
| Zn-N / His-2074                      | 2.05 | (+0.01) |
| Zn-N / His-2061                      | 2.02 |         |
| (Zn-2 / R6, coordination number = 5) |      |         |
| Zn-O / H <sub>2</sub> O -330         | 2.78 | (+0.50) |
| Zn-O / H <sub>2</sub> O -386         | 2.38 | (+0.10) |
| Zn-O / Glu-2397                      | 2.22 | (+0.04) |
| Zn-O / Glu-2399                      | 1.98 |         |
| Zn-N / His-2460                      | 2.20 | (+0.16) |

\*The values were derived from the crystallographic data of small-molecules deposited in Cambridge Structural Database (1).

†The observed bond distances are shown in Å. In parenthesis, the minimum deviation (in Å) from the value range present in the database are shown.

#### References

1. Harding, M. M., (1999) *Acta Crystallogr. D Biol. Crystallogr.* **55**: 1432-1443.
