# Supplementary material
Source: PubMed Central journal article supplement (PMC1891246)

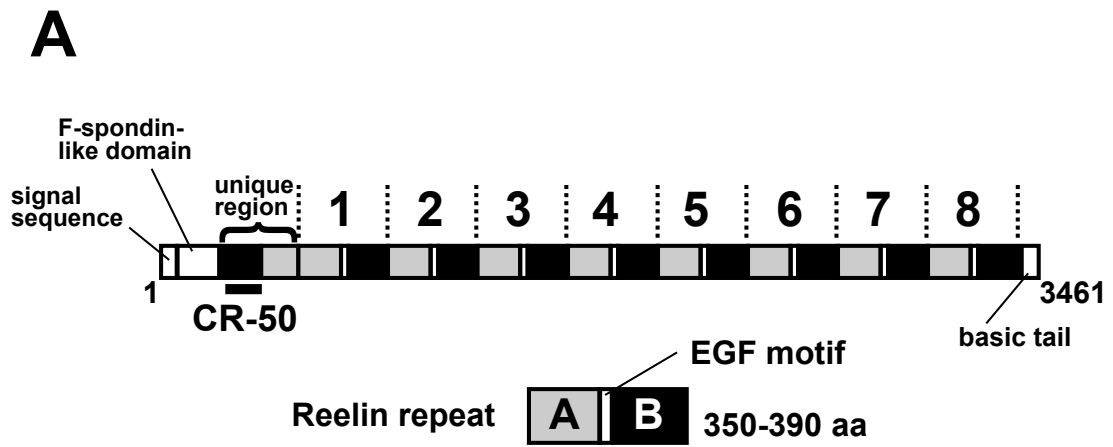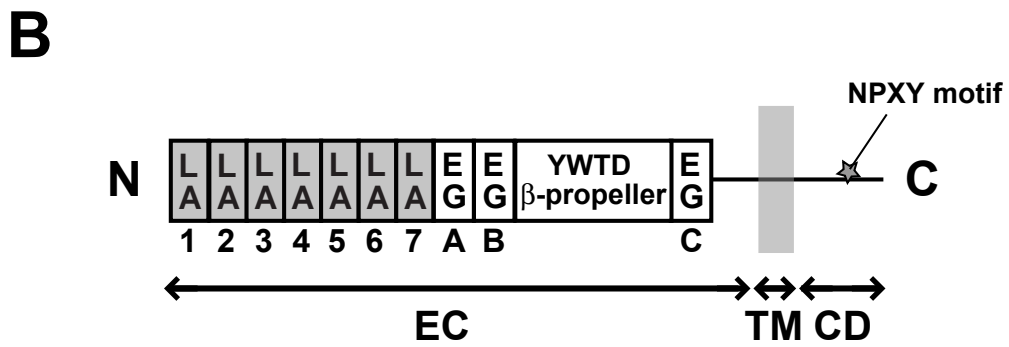

**Fig. 5**

Supplement: pnas_0700438104_1.pdf [file pnas_0700438104_1.pdf]

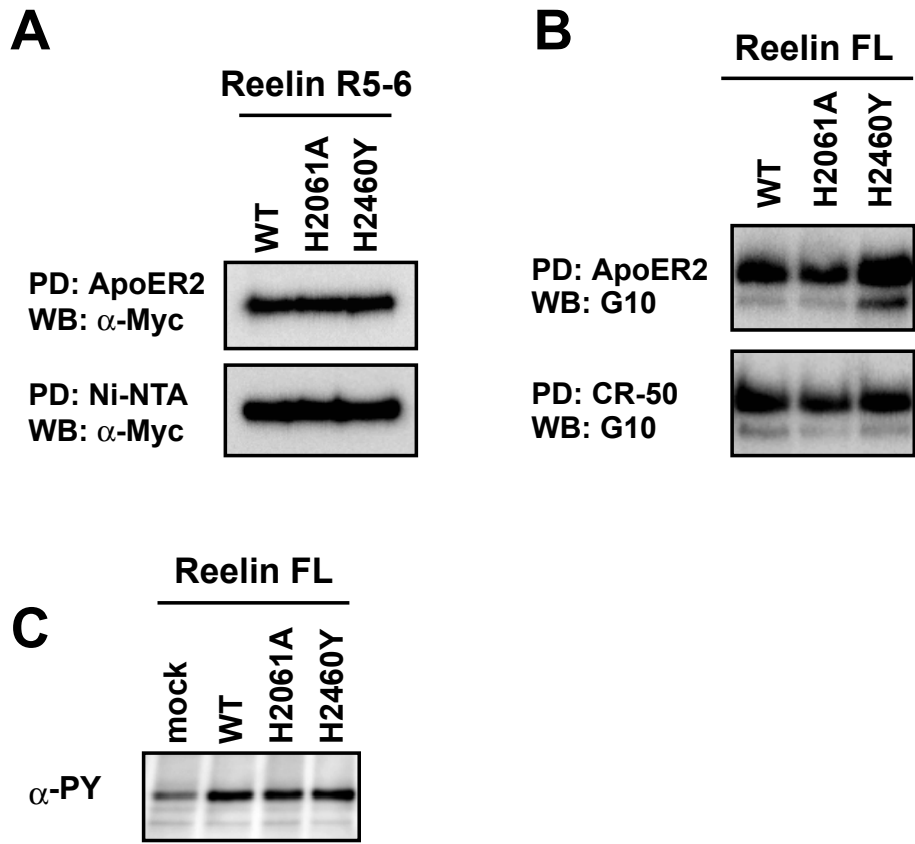

**Fig. 14**

Supplement: pnas_0700438104_10.pdf [file pnas_0700438104_10.pdf]

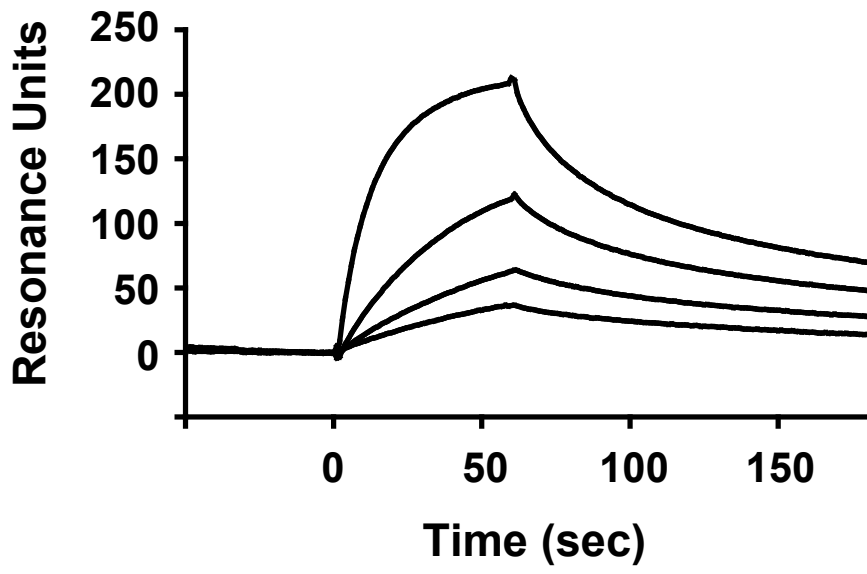

Fig. 15

Supplement: pnas_0700438104_11.pdf [file pnas_0700438104_11.pdf]

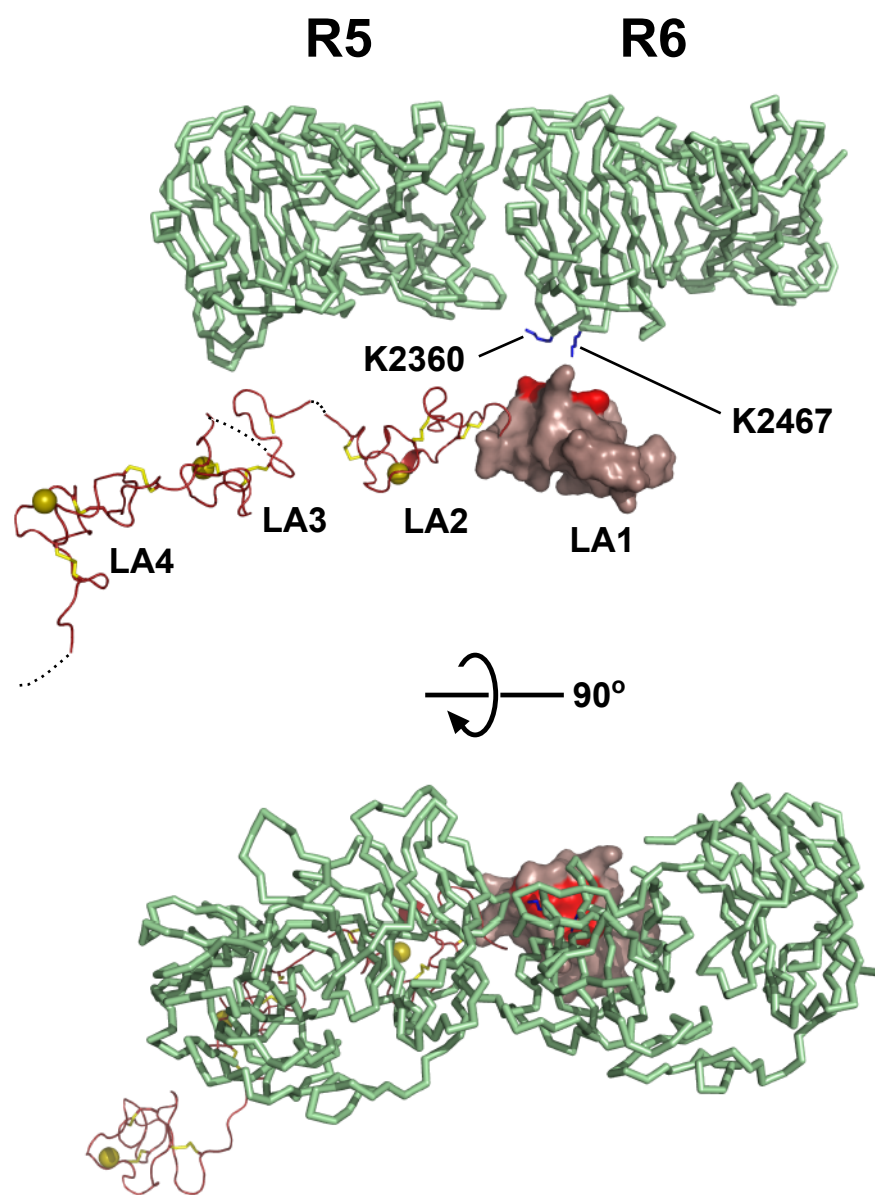

**Fig. 16**

Supplement: pnas_0700438104_12.pdf [file pnas_0700438104_12.pdf]

**A**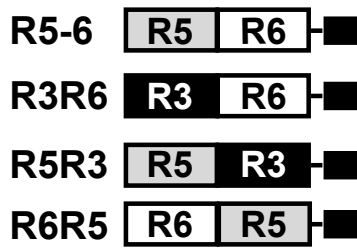**B**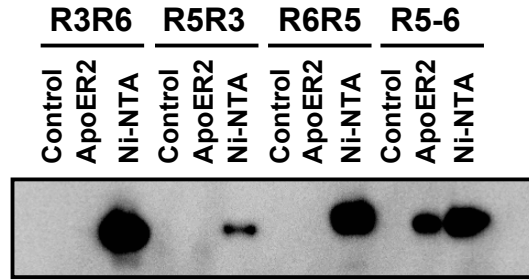**C**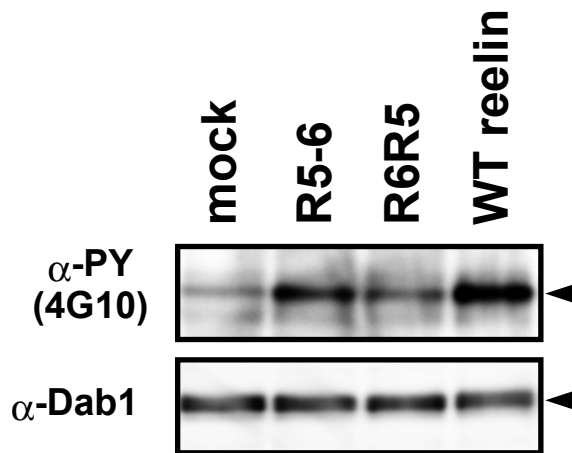**Fig. 6**

Supplement: pnas_0700438104_2.pdf [file pnas_0700438104_2.pdf]

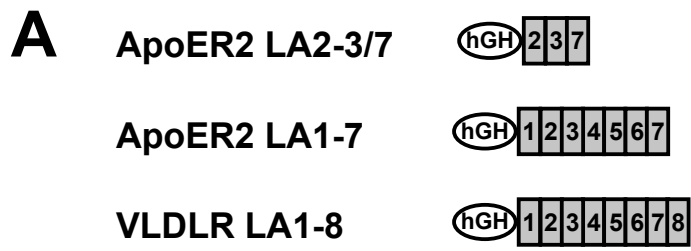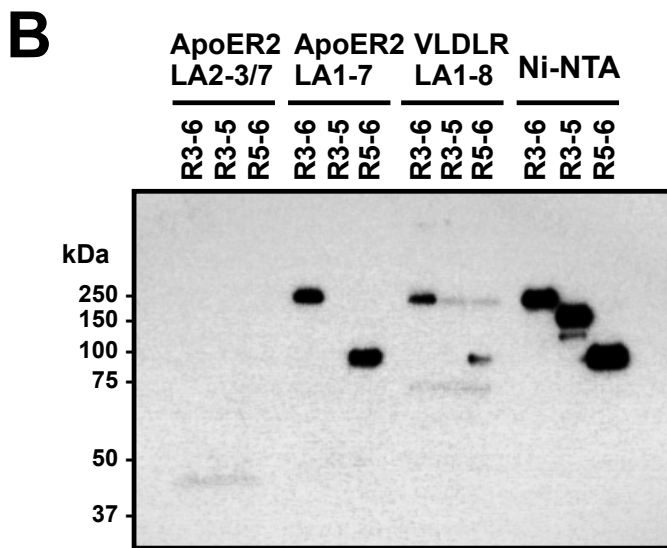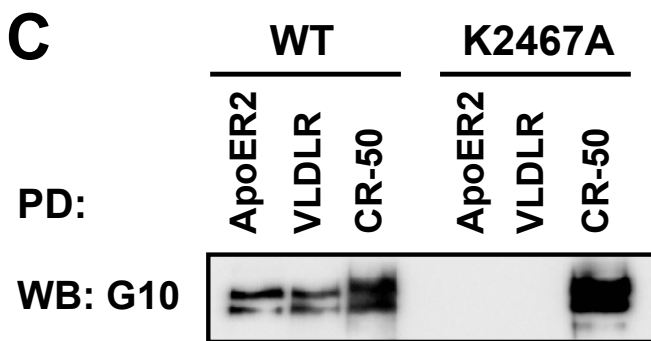

Fig. 7

Supplement: pnas_0700438104_3.pdf [file pnas_0700438104_3.pdf]

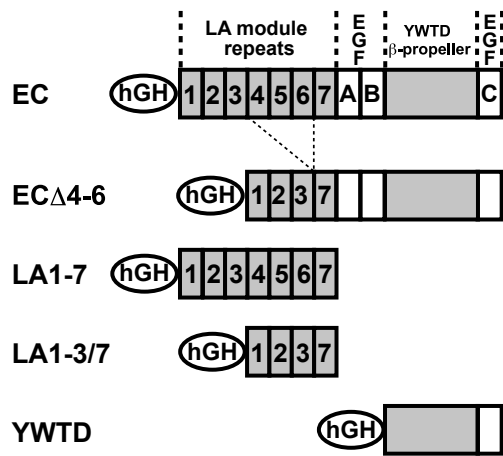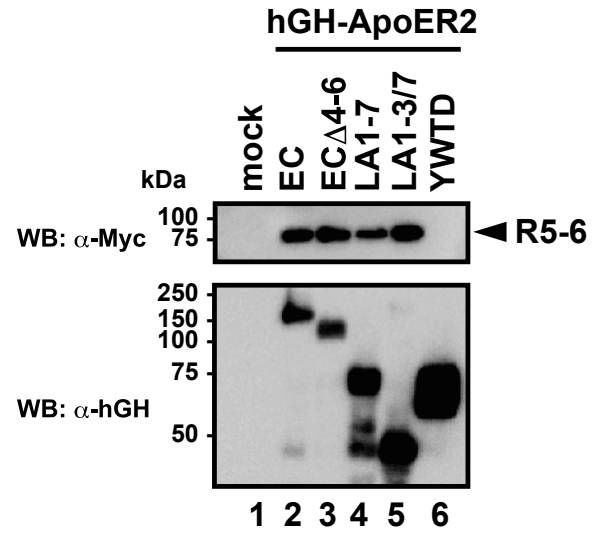

**Fig. 8**

Supplement: pnas_0700438104_4.pdf [file pnas_0700438104_4.pdf]

**A**

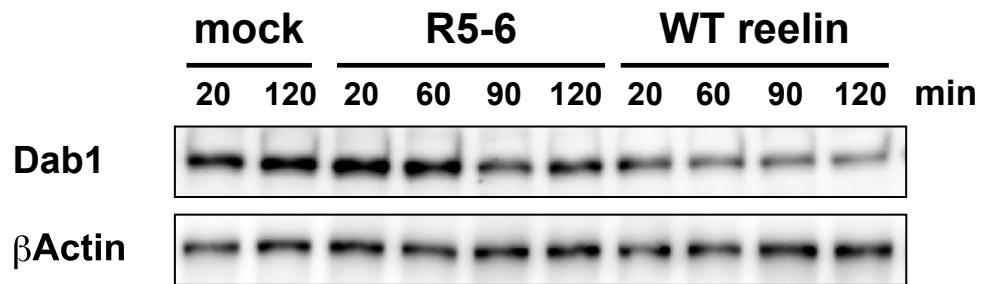

**B**

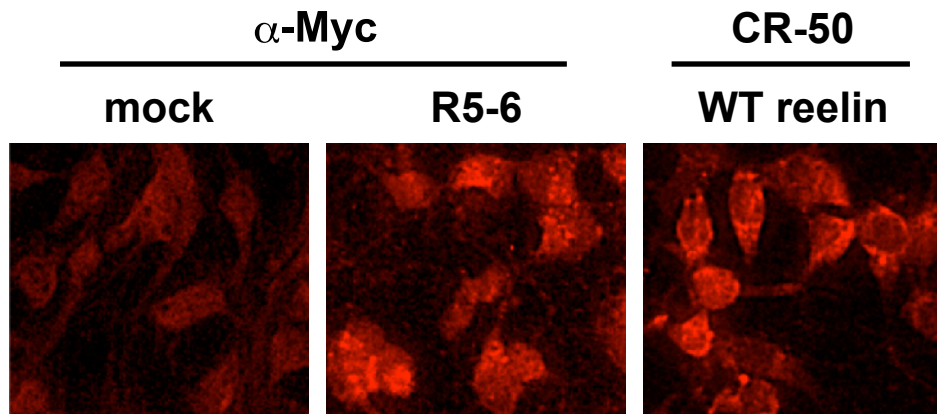

**Fig. 9**

Supplement: pnas_0700438104_5.pdf [file pnas_0700438104_5.pdf]

**A**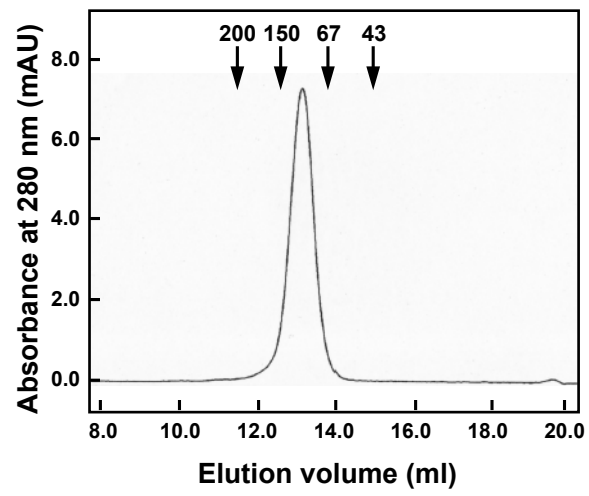**B**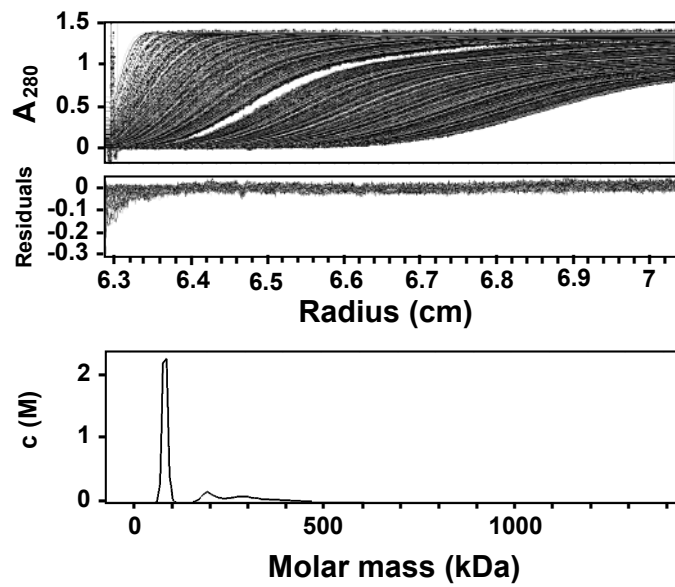**Fig. 10**

Supplement: pnas_0700438104_6.pdf [file pnas_0700438104_6.pdf]

**A**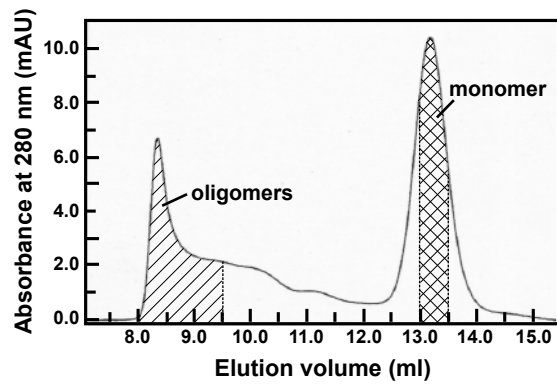**B**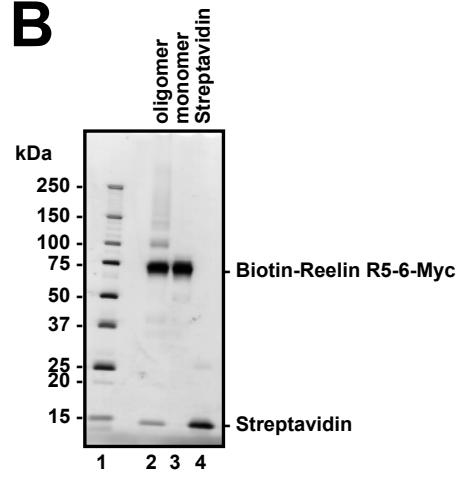**Fig. 11**

Supplement: pnas_0700438104_7.pdf [file pnas_0700438104_7.pdf]

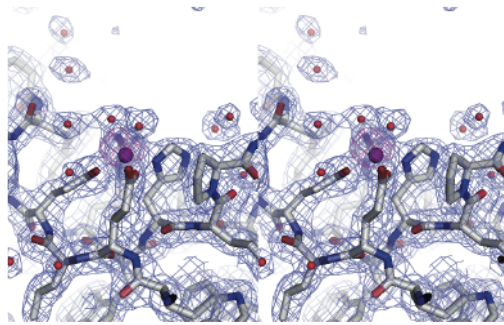

**Fig. 12**

Supplement: pnas_0700438104_8.pdf [file pnas_0700438104_8.pdf]

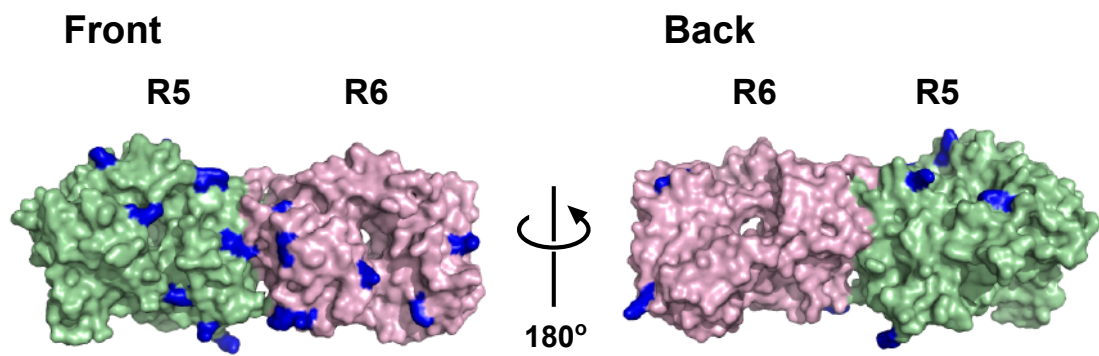

**Fig. 13**

Supplement: pnas_0700438104_9.pdf [file pnas_0700438104_9.pdf]
